# Supplementary material for: The synthesis of amphiphilic polyethyleneimine/calcium phosphate composites for bispecific T-cell engager based immunogene therapy
Source: Royal Society of Chemistry journal article supplement (doi:10.1039/c7bm01143a), 2018-01-01
Supplement: c7bm01143a1.pdf [file c7bm01143a1.pdf]

## Supporting Information

### **The Synthesis of Amphiphilic Polyethyleneimine/Calcium Phosphate Composites for Bispecific T-cell engager based Immunogene therapy**

Pingzhang Chen, Yunhong Liu, Jing Zhao\*, Xiaojuan Pang, Peifa Zhang, Xiaohu Hou,  
Ping Chen, Cheng-yi He, Zhiyong Wang\* and Zhi-ying Chen\*

<sup>a</sup> Sun Yat-sen University, Guangzhou 510275, P. R. China

<sup>b</sup> School of Materials Science and Engineering, Sun Yat-sen University, Guangzhou  
510275, P. R. China

<sup>c</sup> Shenzhen College of Advanced Technology, University of Chinese Academy of  
Sciences, Shenzhen 518055, P. R. China

<sup>d</sup> Department of Clinical Laboratory, The People's Hospital of Longhua , Shenzhen,  
518109, China

\*Corresponding authors:

Dr. Zhiyong Wang, *E-mail*: wangzhiy3@mail.sysu.edu.cn

Dr. Jing Zhao, *E-mail*: jing.zhao@siat.ac.cn

Zhi-Ying Chen, *E-mail*: zy.chen1@siat.ac.cn

## Supporting Figures

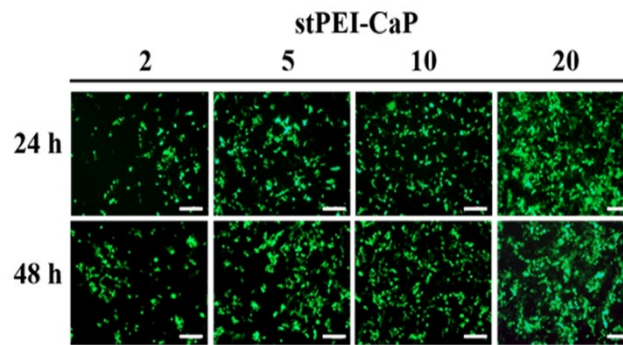

Fig.S1 Different N/P ratio of stPEI-CaP/MC.eGFP were used to transfect 293T cells and fluorescence microscope images have been applied to detected transfection efficiency. Scale bar: 200  $\mu\text{m}$ .

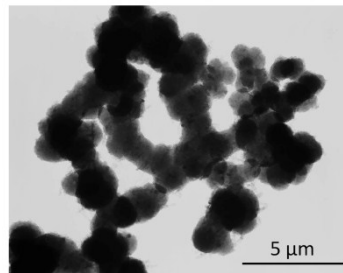

Fig.S2 Transmission electron microscope (TEM) images of stPEI-CaP particles. Scale bar: 5  $\mu\text{m}$ .

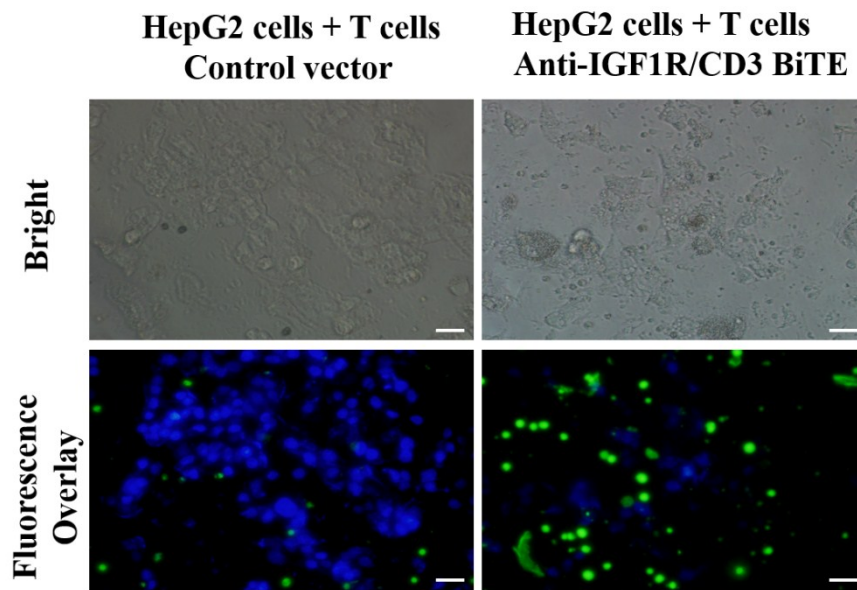

Fig.S3 Fluorescent microscope images of anti-IGF1R/CD3 BiTE antibodies directing T cells contact with HepG2 cells. T cells (green, dyed by CFSE), HepG2 (blue, dyed by Hoechst).
